# Supplementary material for: Identification and Validation of Autophagy-Related Genes in Primary Ovarian Insufficiency by Gene Expression Profile and Bioinformatic Analysis
Source: Hindawi journal article supplement (doi:10.1155/2022/9042380), 2022-07-04

**SLC6A4**

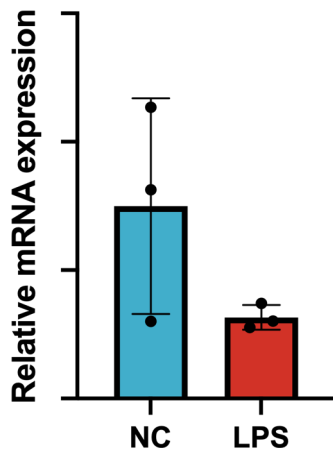

**SYT1**

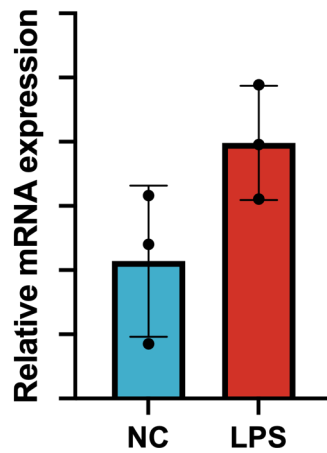

**SLC2A4**

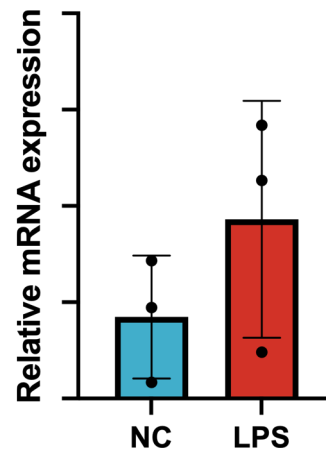

**PTPRN**

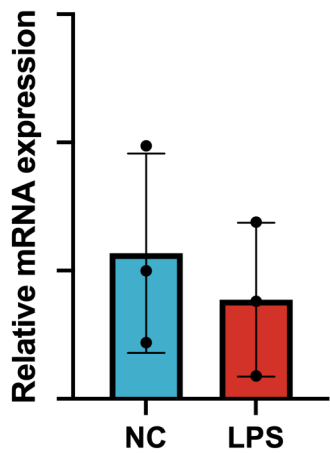

**BSN**

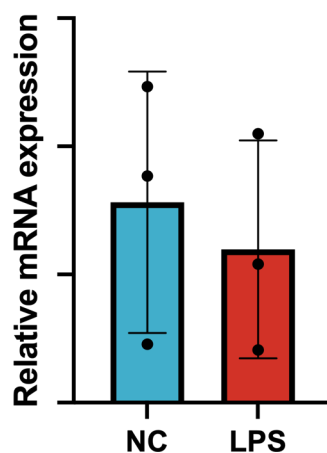

**PRKG1**

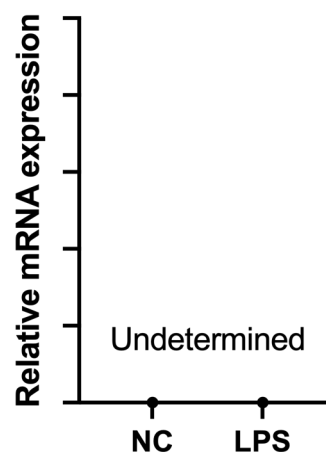

Supplement: f1 [file 9042380.f1.pdf]
